# Supplementary material for: NLRP1- A CINDERELLA STORY: a perspective of recent advances in NLRP1 and the questions they raise
Source: PubMed Central journal article supplement (PMC10725483; doi:10.1038/s42003-023-05684-3), 2023-12-16
Supplement: 42003_2023_5684_MOESM1_ESM.pdf [file 42003_2023_5684_MOESM1_ESM.pdf]

## **Supplementary Tables**

NLRP1- A CINDERELLA STORY: a perspective of recent advances in NLRP1 and the questions they raise.

Kristian Barry <sup>1,2</sup>, Christopher Murphy <sup>3</sup>, and Ashley Mansell <sup>1,2</sup>

<sup>1</sup>Centre for Innate Immunity and Infectious Diseases, Hudson Institute of Medical Research, Clayton, VIC, Australia

<sup>2</sup>Department of Molecular and Translational Sciences, Monash University, Clayton, VIC, Australia

<sup>3</sup>7 Warren St., Upton, MA 01568, USA

### **Corresponding Author:**

Ashley Mansell: [ashley.mansell@hudson.org.au](mailto:ashley.mansell@hudson.org.au)

| Mutation                                                                  | Region             | GoF/LoF       | Disease                                                                                                          | Phenotype                                                                                                                   | Ref.       |
|---------------------------------------------------------------------------|--------------------|---------------|------------------------------------------------------------------------------------------------------------------|-----------------------------------------------------------------------------------------------------------------------------|------------|
| A54T                                                                      | PYD                | GoF           | Multiple self-healing palmoplantar carcinoma (MSPC), familial keratosis lichenoides chronica (FKLC).             |                                                                                                                             | 20         |
| A66V                                                                      | PYD                | GoF           | MSPC, FKLC.                                                                                                      |                                                                                                                             | 20         |
| M77T                                                                      | PYD                | GoF           | MSPC, FKLC, Corneal intraepithelial dyskeratosis.                                                                | Corneal lesions and thickening                                                                                              | 20, 58     |
| L155H                                                                     | Linker (PYD-NACHT) | GoF           | Vitiligo, autoinflammatory disease, COVID-19 severity*                                                           | Increased IL-1 $\beta$ processing.                                                                                          | 21, 59, 60 |
| G578S                                                                     | NACHT              | GoF           | Multiple sclerosis and malignant Melanoma.                                                                       | Vertigo, weakness of limbs, sight issues, melanoma. Increase gene expression in IL-1 $\beta$ , NFKB1, JUN and P38 pathways. | 29         |
| p.R726W                                                                   | Linker (NACHT-LRR) | GoF           | NAIAD – NLRP1-associated autoinflammation with arthritis and dyskeratosis.                                       | Recurrent fever, dyskeratosis, increased Neutrophils. IL-18 and cleaved caspase-1                                           | 24         |
| T755N                                                                     | Linker (NACHT-LRR) | GoF           | Juvenile onset recurrent respiratory papillomatosis.                                                             | Laryngeal lesions, papilloma growth, warts, mild keratosis pilaris.                                                         | 61         |
| L813P                                                                     | LRR                | GoF           | Differed between siblings, one with Multiple keratoacanthomas, one with familial keratosis lichenoides chronica. | Erythema, anaemia, blistering, eye inflammation, hyperkeratotic plugs, papillomatosis, failure to thrive.                   | 22         |
| p.F787_R843del                                                            | LRR                | GoF           | MSPC, FKLC.                                                                                                      |                                                                                                                             | 20         |
| M1184V                                                                    | FIIND              | GoF           | Asthma*, Vitiligo.                                                                                               | Increased IL-1 $\beta$ processing.                                                                                          | 27, 60     |
| P1214R                                                                    | FIIND              | GoF           | NAIAD – NLRP1-associated autoinflammation with arthritis and dyskeratosis.                                       | Recurrent fever, dyskeratosis, increased Neutrophils. IL-18 and cleaved caspase-1                                           | 24         |
| G167S                                                                     | DPP9               | LoF (in DPP9) | Hatipoğlu syndrome.                                                                                              | Recurrent HSV infection, airway inflammation, skin pigmentation anomalies.                                                  | 34         |
| R252P                                                                     | DPP9               | LoF (in DPP9) | Hemophagocytic lymphohistiocytosis-like hyperinflammation                                                        | Pancytopenia, skin manifestations, increased susceptibility to infections                                                   | 35         |
| R147C, Asn864ThrfsTer4 (frameshift), T246S, T878M, T995I, M1119V, V1241L. |                    | N/A           | Multiple Sclerosis*                                                                                              |                                                                                                                             | 29         |
| rs12150220                                                                | N/A                | N/A           | Type 1 diabetes*                                                                                                 |                                                                                                                             | 62         |
| rs8079034C and rs878329C                                                  | N/A                | N/A           | Psoriasis*                                                                                                       |                                                                                                                             | 23         |
| rs2137722/G-rs12150220/T-rs2670660/G                                      | N/A                | N/A           | Leprosy*                                                                                                         | Genetic association with SNPs, if missing rs2137722 then only associated with one form of leprosy.                          | 63         |
| rs2670660, rs12150220-rs2670660                                           | N/A                | N/A           | Systemic Lupus*                                                                                                  | Increased rash, nephritis and arthritis                                                                                     | 64         |

\* Genetic association disease studies

**Supplementary Table 1. Summary of NLRP1 gain of function variants and their disease associations.**

| <b>Activator</b>                   | <b>Human / Mouse</b> | <b>Mechanism</b>                 | <b>Ref.</b> |
|------------------------------------|----------------------|----------------------------------|-------------|
| <b>Val-BoroPro / Talabostat</b>    | Mouse and Human      | Inhibits DPP9 inhibitory complex | 3, 33, 65   |
| <b>Anthrax Lethal Factor</b>       | Mouse                | Functional degradation           | 7, 8        |
| <b>Toxoplasma Gondii infection</b> | Mouse                | N/A                              | 66, 67      |
| <b>UVB Radiation</b>               | Human                | Ribotoxic Stress                 | 32, 36, 37  |
| <b>Anisomycin</b>                  | Human                | Ribotoxic Stress                 | 32          |
| <b>Hygromycin</b>                  | Human                | Ribotoxic Stress                 | 32          |
| <b>Doxyvinenol</b>                 | Human                | Ribotoxic Stress                 | 32          |
| <b>Diphtheria toxin</b>            | Human                | Ribotoxic Stress                 | 42, 43      |
| <b>Exotoxin A (pseudomonas)</b>    | Human                | Ribotoxic Stress                 | 42, 43      |
| <b>SidI (Legionella)</b>           | Human                | Ribotoxic Stress                 | 42          |
| <b>Cholix toxin</b>                | Human                | Ribotoxic Stress                 | 43          |
| <b>Nigericin</b>                   | Human                | Ribotoxic Stress                 | 52          |
| <b>dsRNA (Poly(I:C))</b>           | Human                | Direct Sensing                   | 30          |
| <b>dsDNA (Poly(dA:dT))</b>         | Human                | Direct Sensing                   | 48          |
| <b>Viral 3C Proteases</b>          | Human                | Protease activity - Tripwire     | 49          |
| <b>Alphavirus</b>                  | Human                | Ribotoxic Stress                 | 38          |

**Supplementary Table 2. Summary of NLRP1 agonists and species specificity**
